# Supplementary material for: Cell cycle analysis of fetal germ cells during sex differentiation in mice
Source: PubMed Central journal article supplement — Biol Cell. 2009 Jul 31;101(Pt 10):587–98. doi: 10.1042/BC20090021 (PMC2722160; doi:10.1042/bc20090021), 2009-07-31

## Supplementary online data

# Cell cycle analysis of fetal germ cells during sex differentiation in mice

Cassy Spiller\*†, Dagmar Wilhelm\* and Peter Koopman\*†<sup>1</sup>

\*Division of Molecular Genetics and Development, Institute for Molecular Bioscience, The University of Queensland, Brisbane, QLD 4072, Australia, and †ARC Centre of Excellence in Biotechnology and Development, Institute for Molecular Bioscience, The University of Queensland, Brisbane, QLD 4072, Australia

**Table S1 | qPCR primer sequences**

| Name              | Accession number | Forward primer             | Reverse primer            | Product size (bp) |
|-------------------|------------------|----------------------------|---------------------------|-------------------|
| <i>18S</i>        | X56974           | gatccattggag               | ccaagctccaactac           | 103               |
| <i>Mvh</i>        | NM_010029        | acggaatgccatcaaaggaacaac   | cccaacagcgacaacaagtaactg  | 119               |
| <i>Sox9</i>       | NM_011448        | agtaccgcacatcgcaaac        | tacttgtaatcggggtggtct     | 145               |
| <i>Fst</i>        | NM_008046        | gacaatactctctcaagtggatggtt | ggttattctcttcttcattcgacat | 128               |
| <i>Tnfrsf5ip1</i> | NM_134138        | agcgattctgagttttgtattcg    | ctgccatctggatctcttagaa    | 91                |
| <i>Rbl2</i>       | NM_011250        | gggagacatggattatctggt      | gccaagagtgacctgtgga       | 60                |
| <i>Camk2g</i>     | NM_178597        | gatcaaagctggagcctacg       | gcttcaggagtgactgtgtcc     | 68                |
| <i>E2f6</i>       | NM_033270        | ggaataggagcctctccatctaa    | gccgctcactctgagttctt      | 95                |
| <i>Gas2</i>       | NM_008087        | aaagtccaagcttttactctgg     | gcagcagaggaaaggaagcta     | 69                |
| <i>Cks1b</i>      | NM_016904        | cccagcaggccatattactc       | ttcacaccctctgtaacaga      | 74                |
| <i>Camk2a</i>     | NM_077407        | ggagactttgagtcctacacgaa    | caaatagaatcgatgaagtcca    | 109               |
| <i>Rbl1</i>       | NM_011249        | gcggcaactacagcctaga        | tgcggaagcaacatataaa       | 69                |
| <i>Dst</i>        | NM_134448        | acagtgatggtcgtgttg         | cattactcccgtgatggtg       | 96                |

Received 3 February 2009/6 April 2009; accepted 6 May 2009

Published as Immediate Publication 6 May 2009, doi:10.1042/BC20090021

<sup>1</sup>To whom correspondence should be addressed (email p.koopman@imb.uq.edu.au).

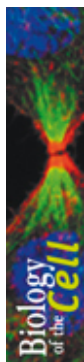

Supplement: boc1010587add.pdf [file boc1010587add.pdf]
